# Supplementary material
Source: publisher site journal article supplement (https://www.dovepress.com/article/558880)
Supplement: Supplementary file 1 [file 558880_Supplementary_Material-Revised-1202%20%281%29.docx]

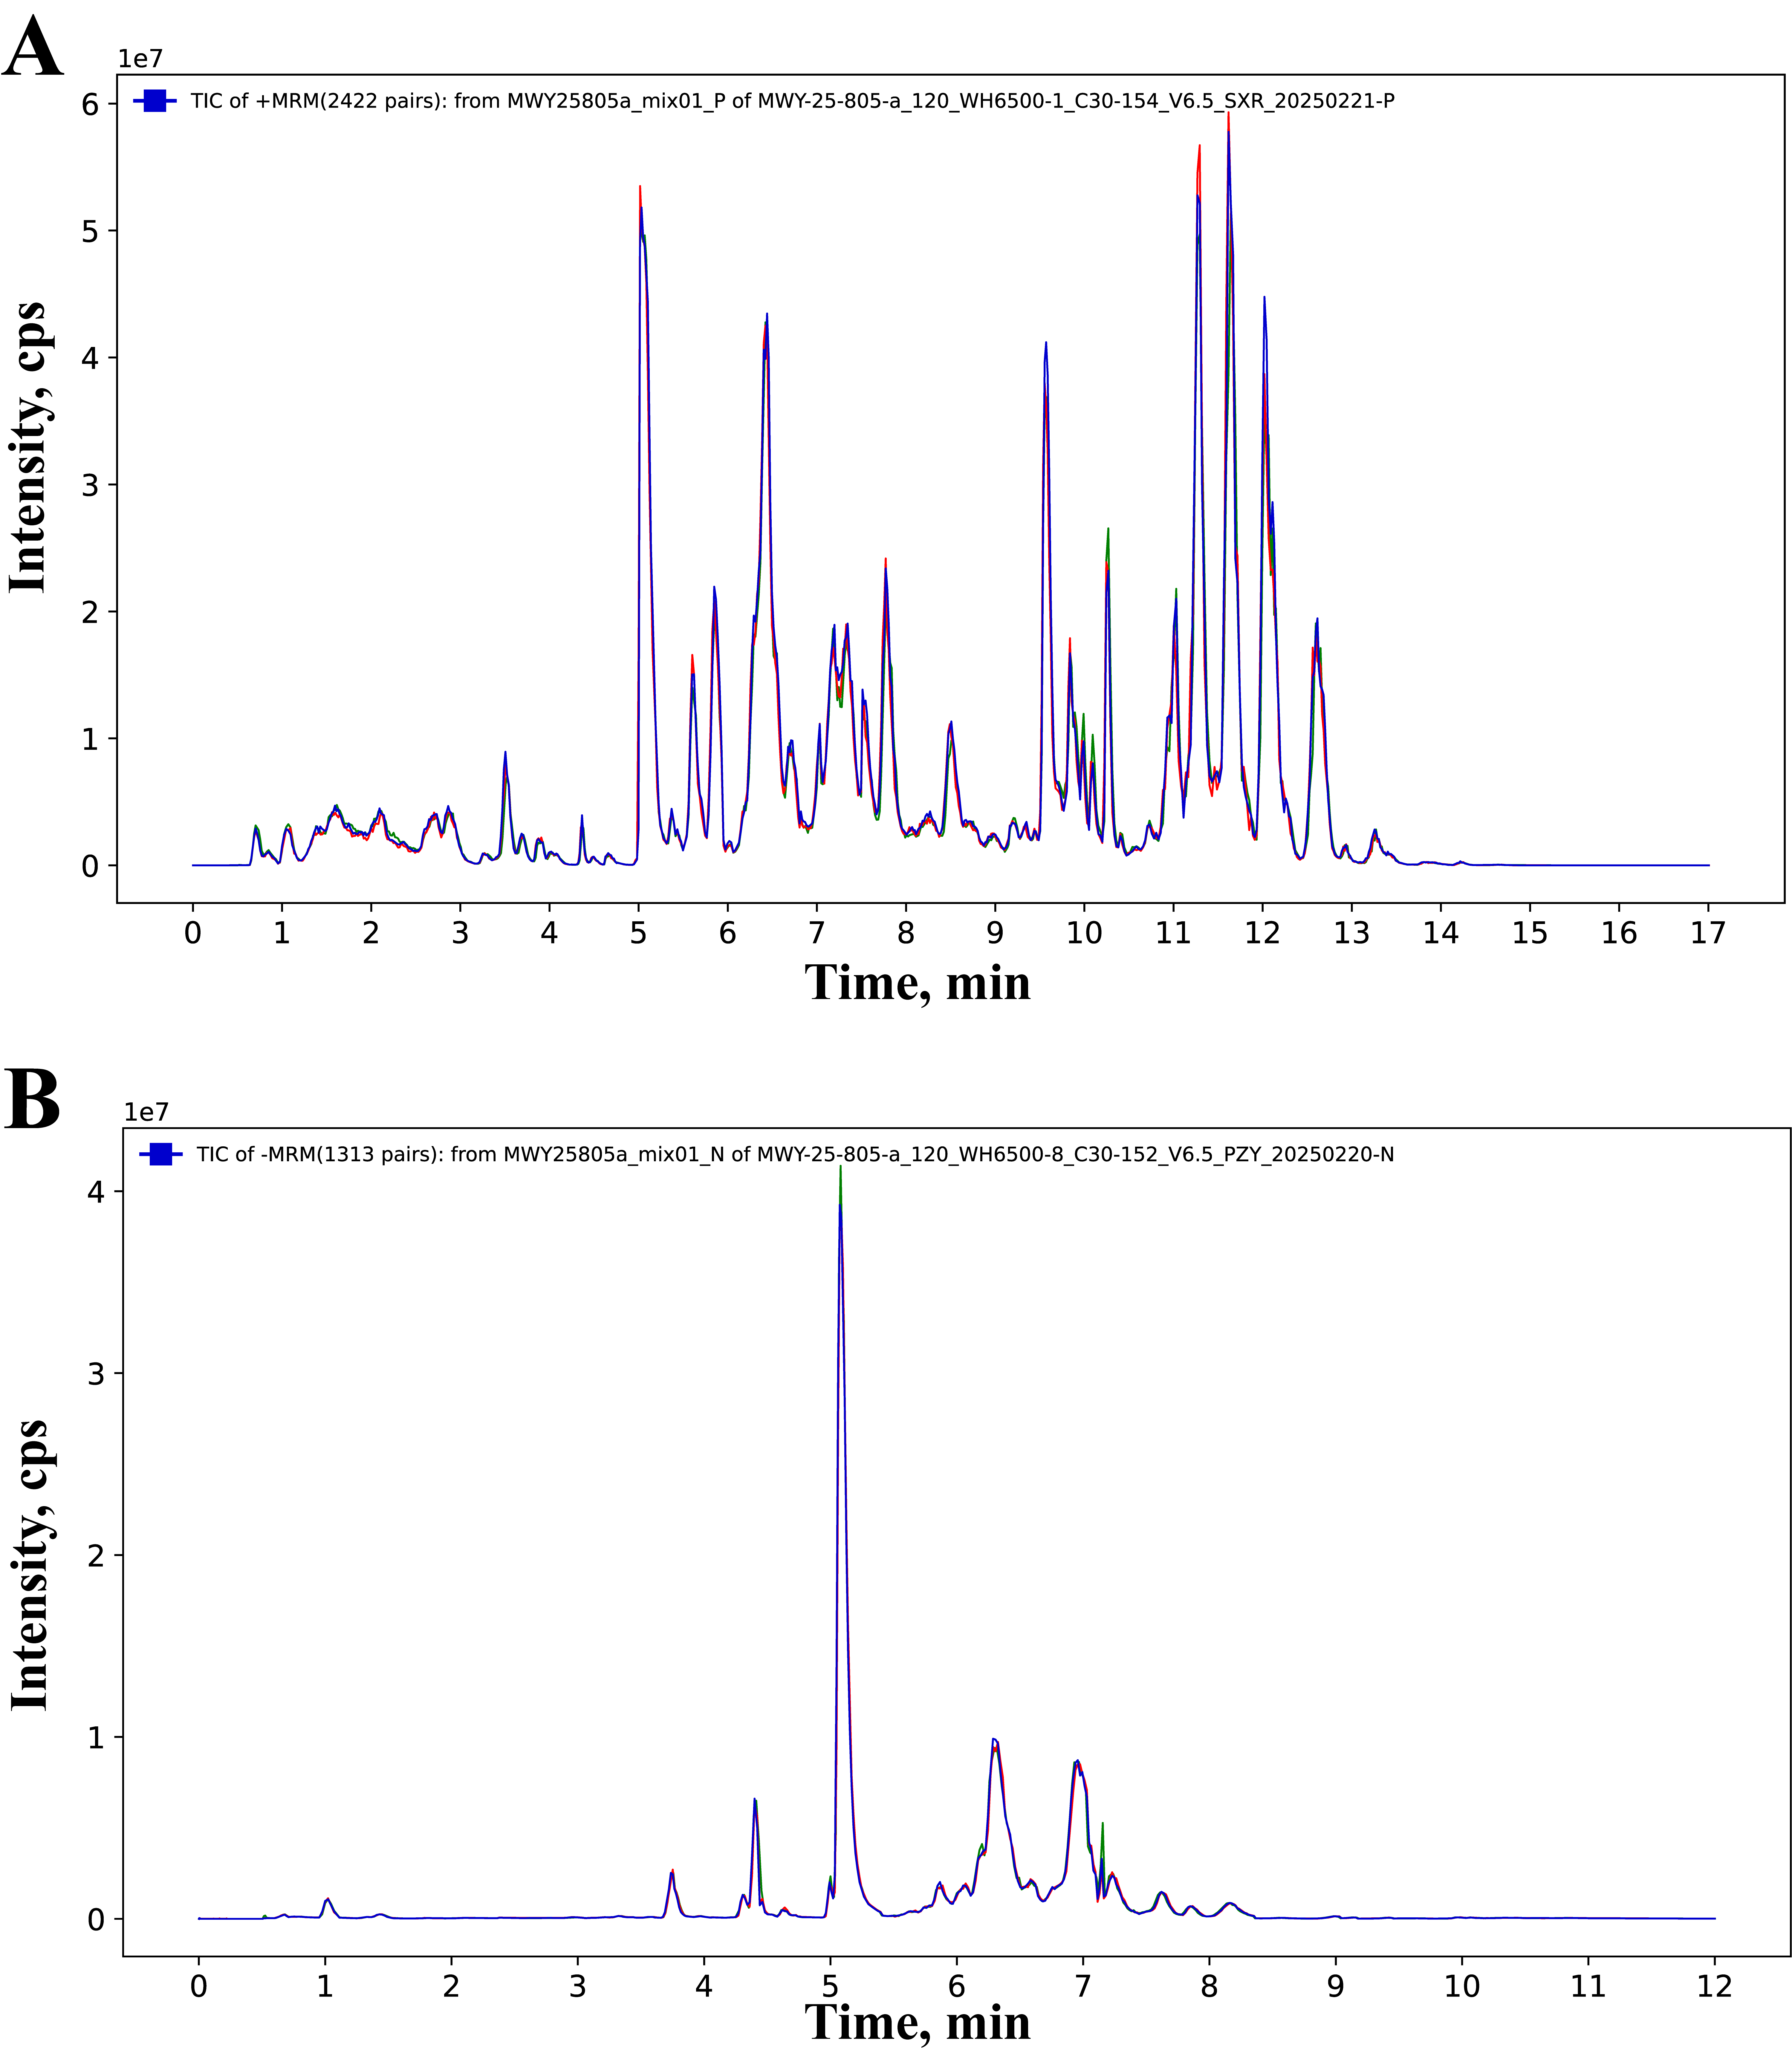


**Figure S1.** Total ionization chromatography (TIC) of mixed samples. (A) Positive ion mode, (B) Negative ion mode.


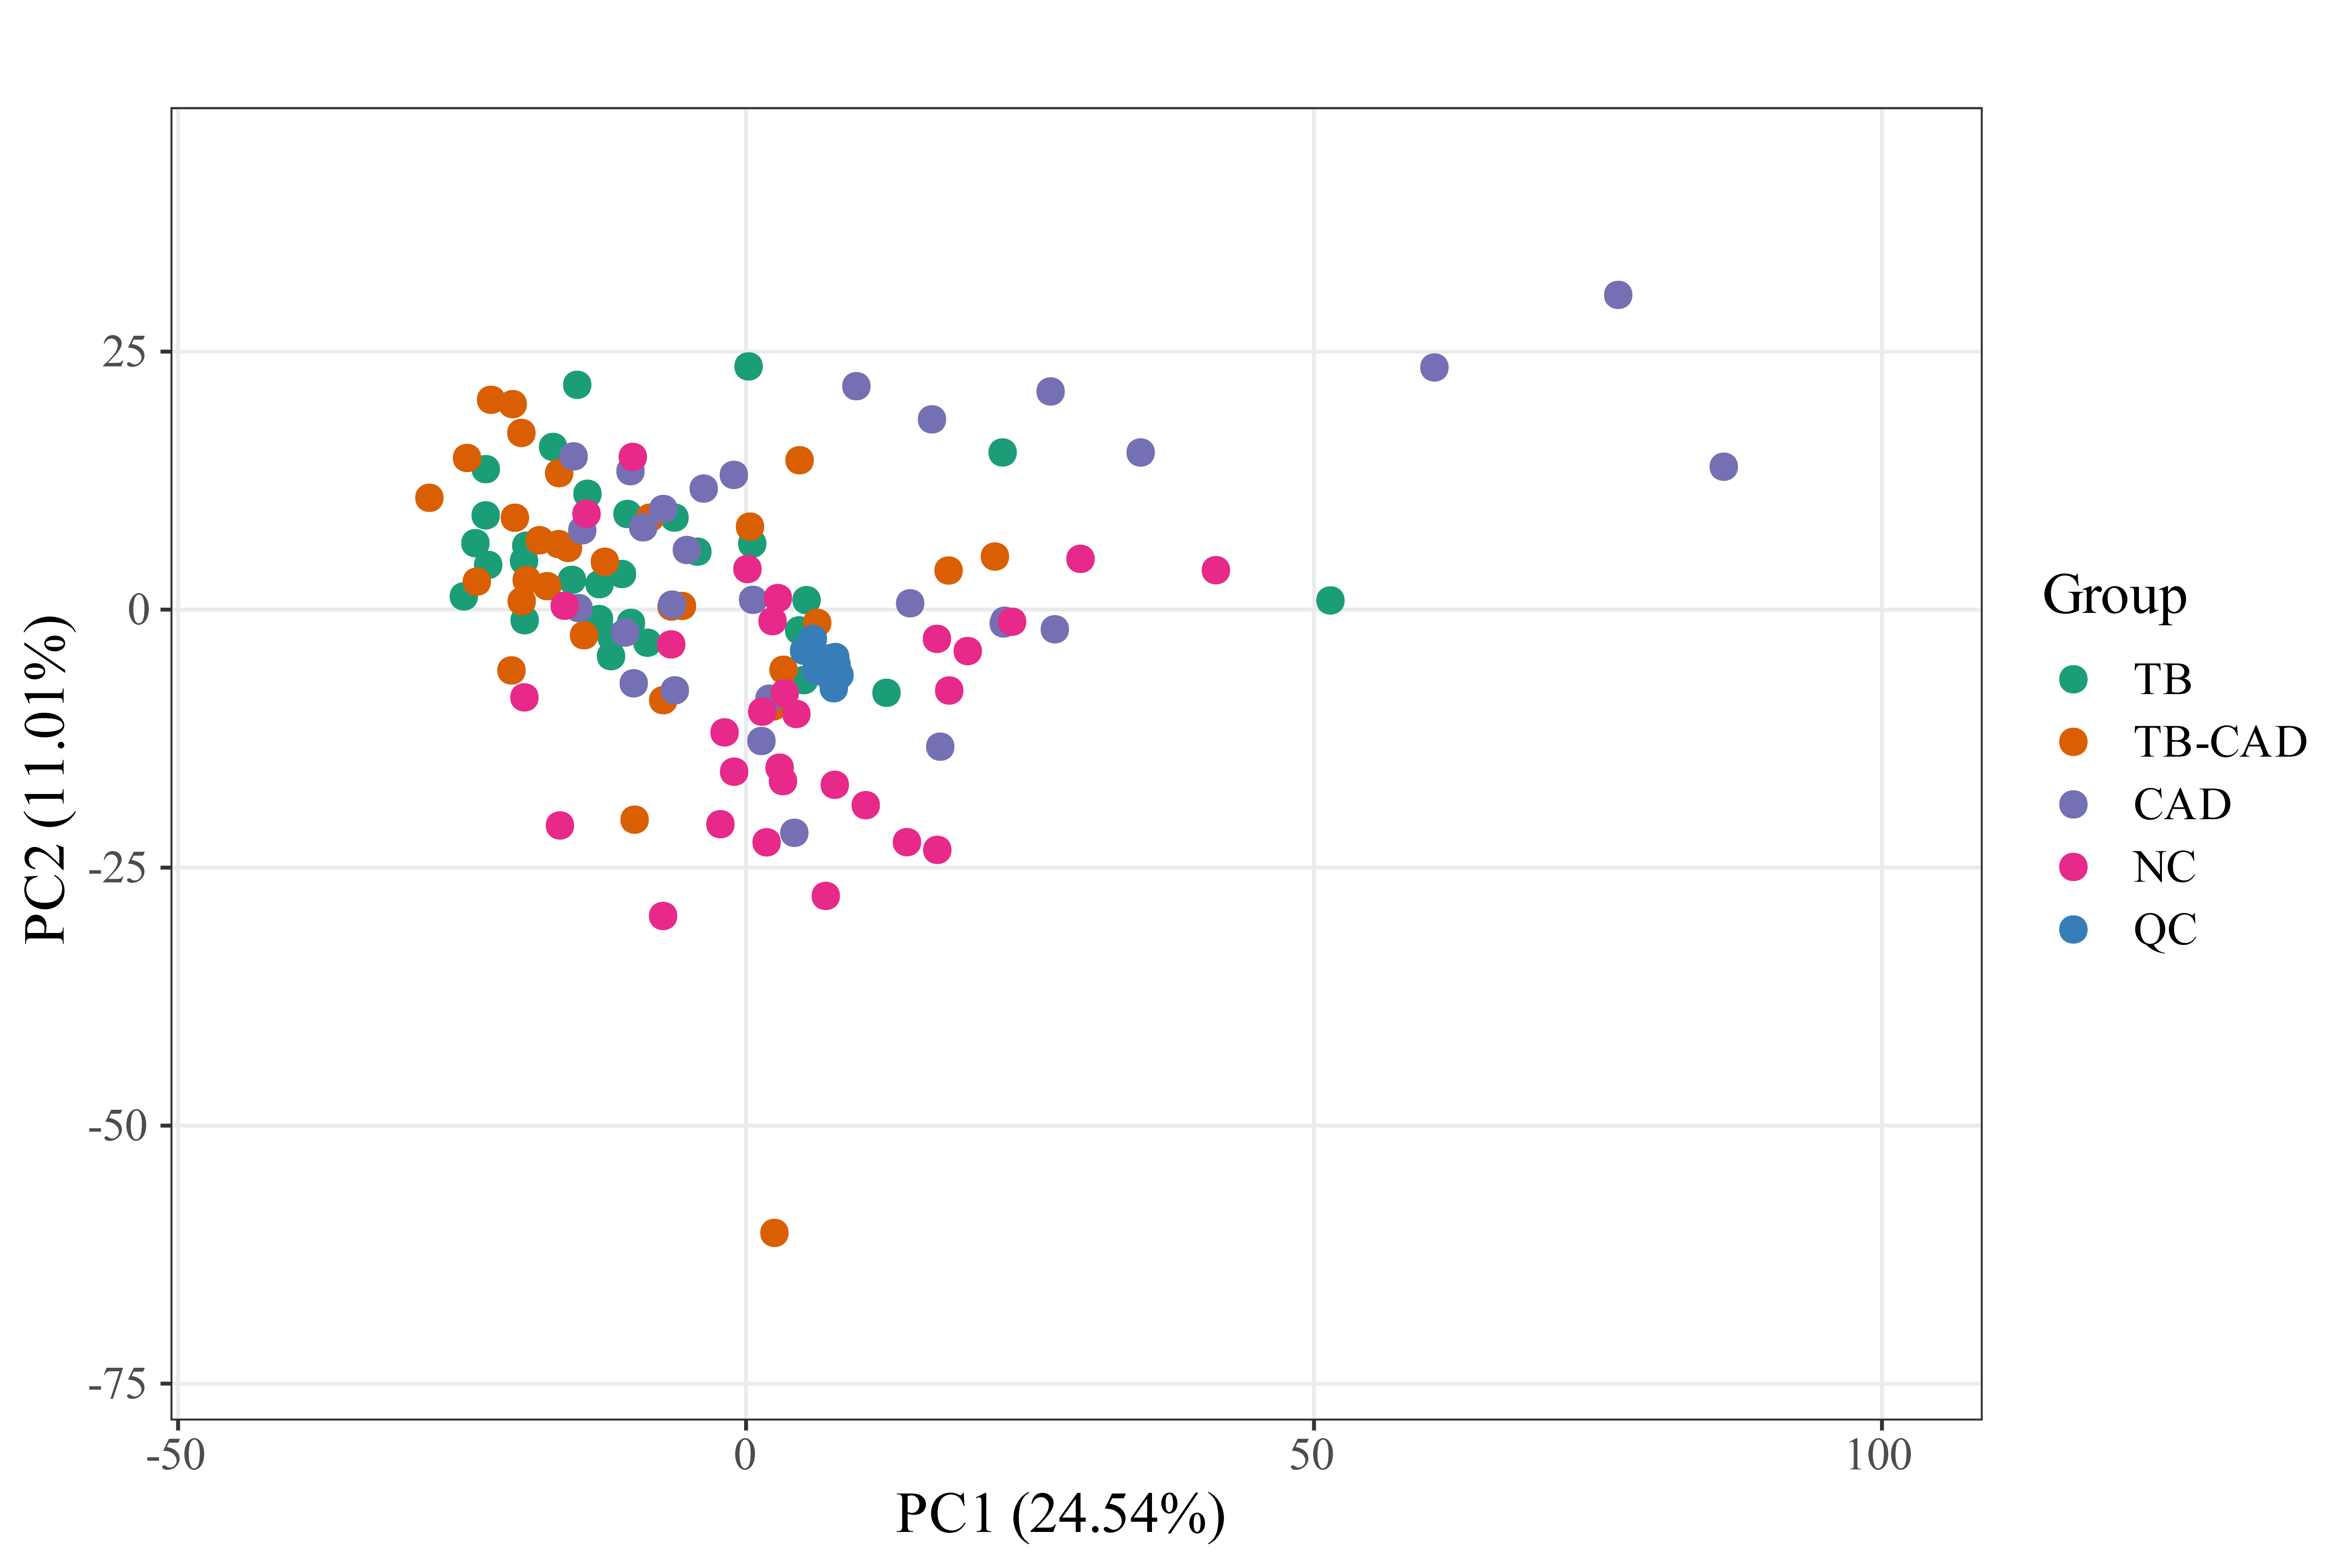


**Figure S2.** PCA score plots of QC and all samples.


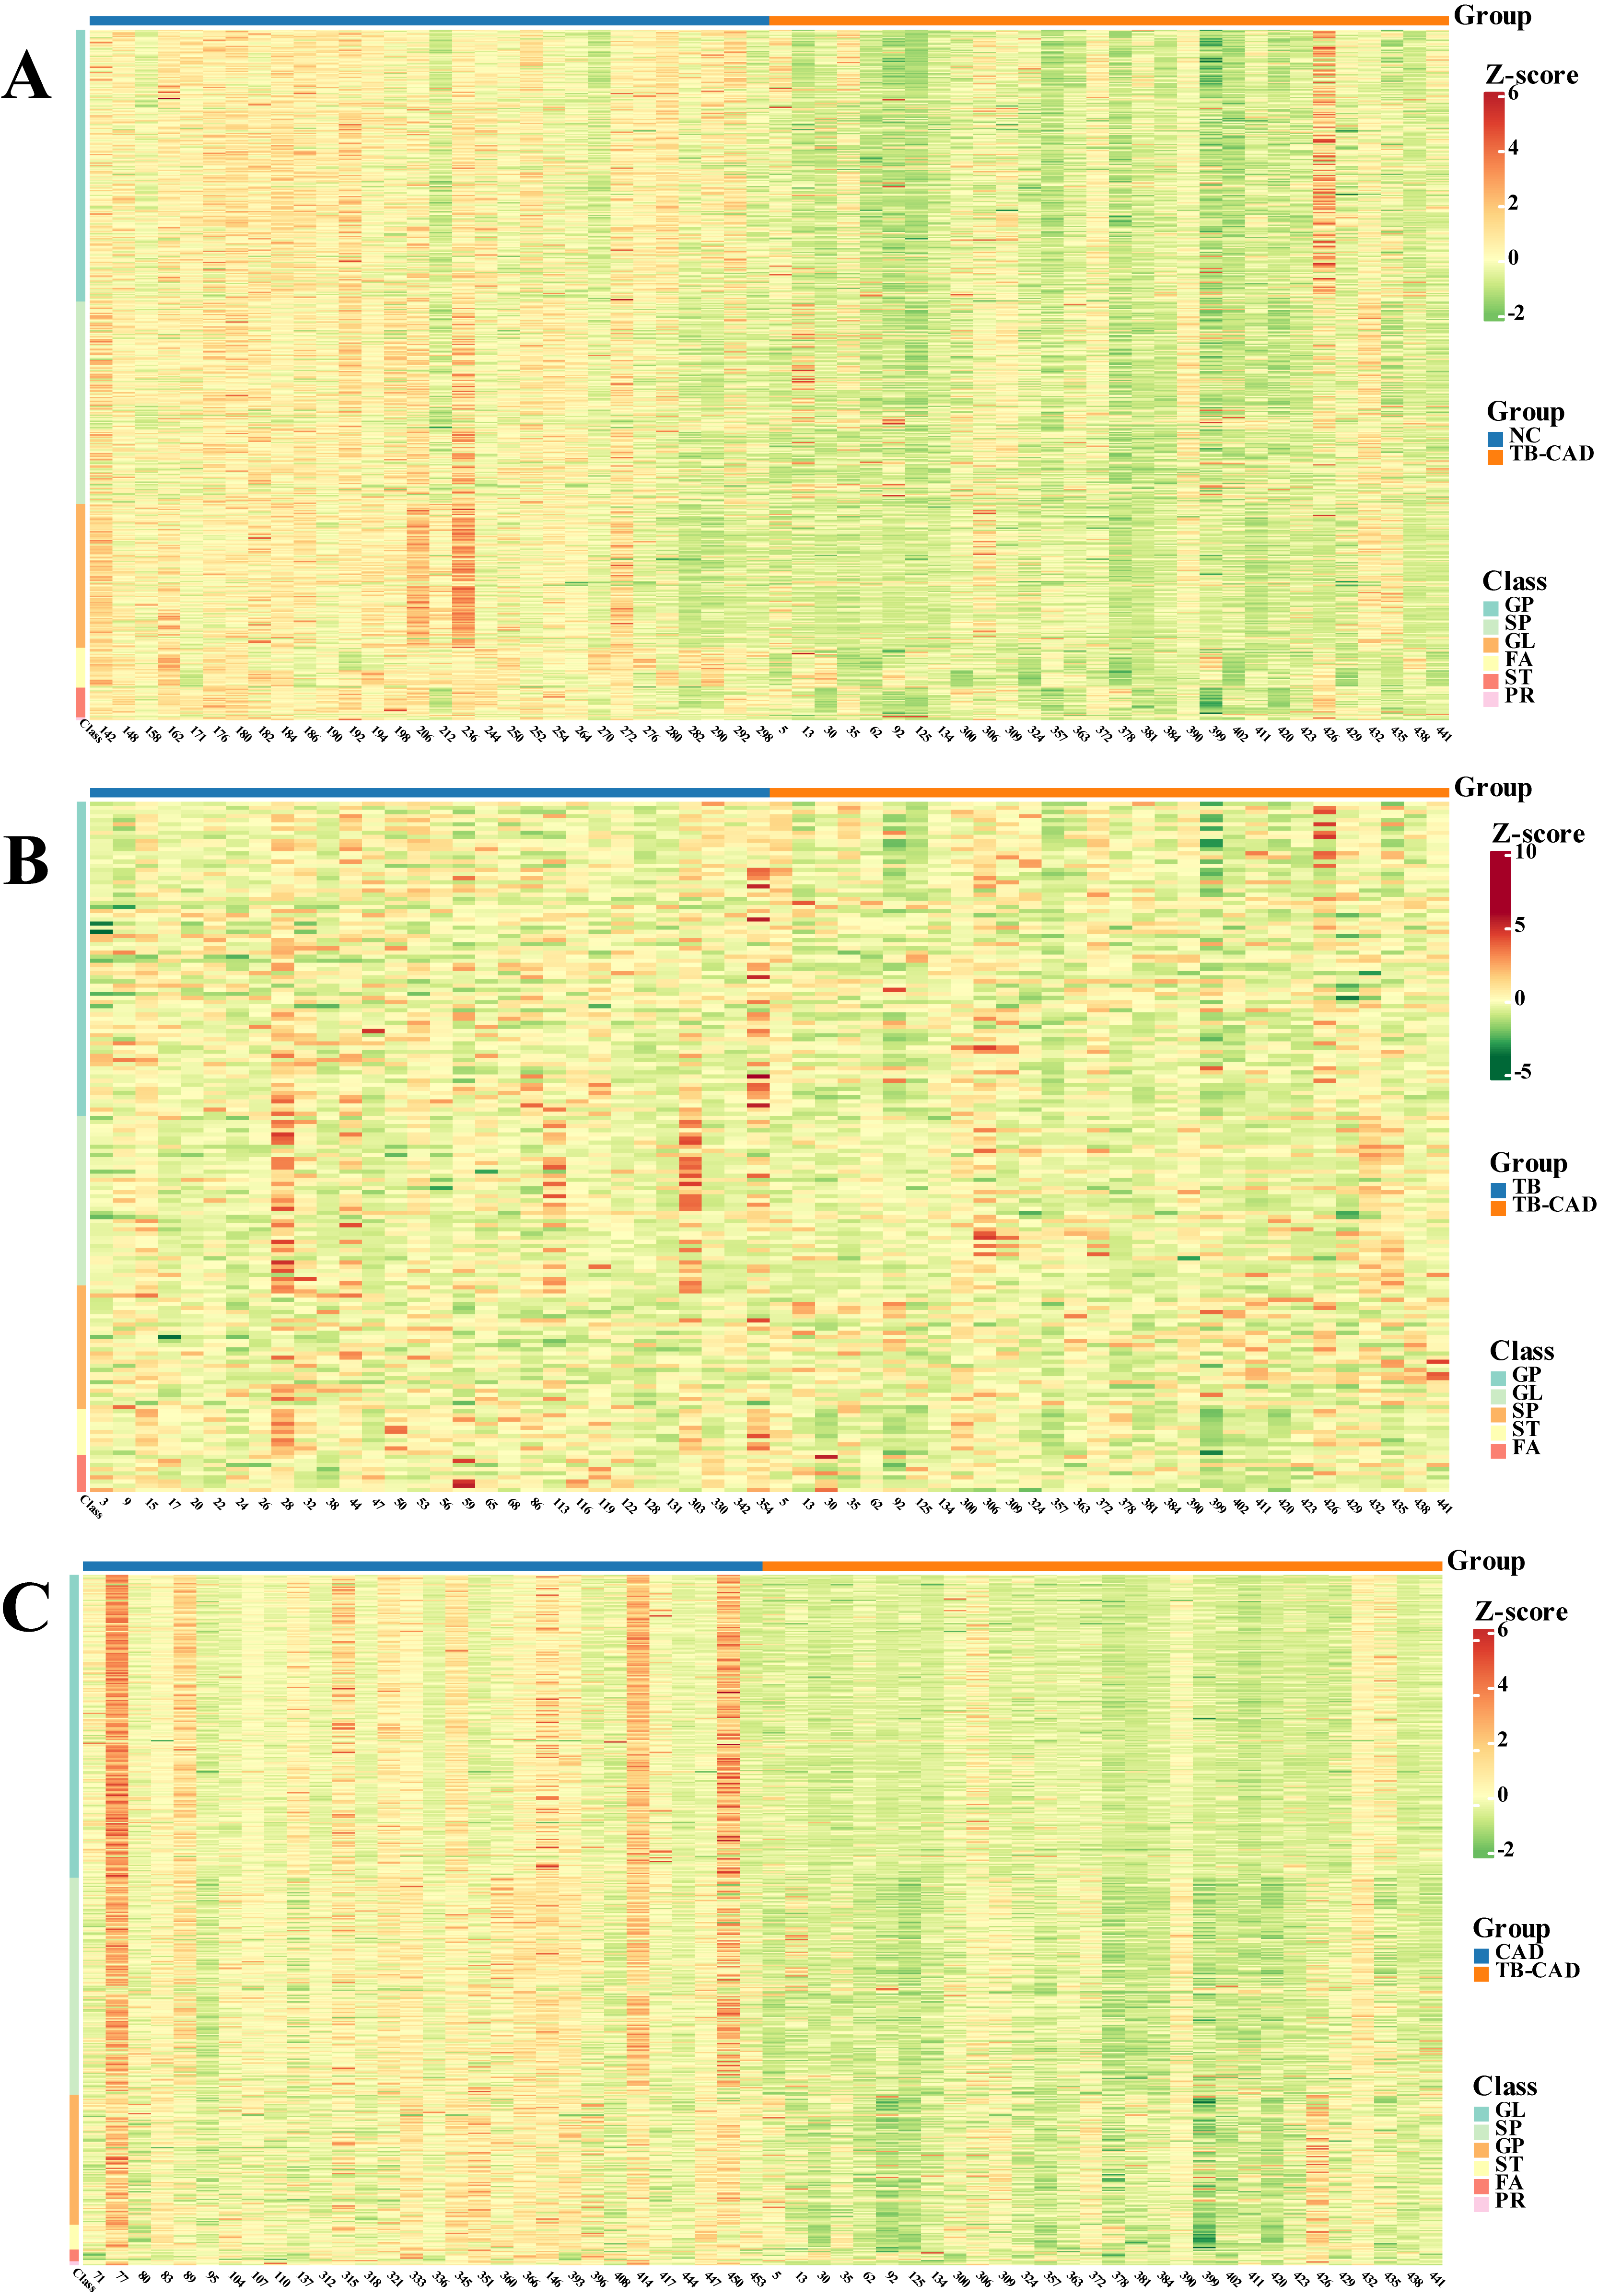


**Figure S3**. The heatmaps of the differential lipid abundance among all groups. Red for higher level and green for lower level. (A) The cluster heatmap of NC *vs*. TB-CAD, (B) The cluster heatmap of TB *vs.* TB-CAD, (C) The cluster heatmap of CAD *vs*. TB-CAD.

**Table S1** The sub class of K-means clusters

| Sub class | Compounds |
| --- | --- |
| 2 | Cer(t30:0/18:1(2OH)) |
| 2 | CE(18:0) |
| 2 | HexCer(d18:1/23:0) |
| 2 | SHexCer(d18:1/16:0) |
| 2 | Cer(t18:0/24:0) |
| 2 | LPC(O-16:0) |
| 2 | SM(d18:1/23:0) |
| 2 | Cer(d22:0/18:1) |
| 2 | PE(P-18:0_22:6) |
| 2 | PE(P-20:2_22:6) |
| 2 | PE(P-18:0_20:4) |
| 2 | CE(24:1) |
| 2 | Cer(d18:1/42:1(2OH)) |
| 2 | Cer(d16:1/26:0) |
| 2 | SM(d18:1/24:0) |
| 2 | PE(P-17:0_22:6) |
| 2 | Cer(d19:1/23:0) |
| 2 | Cer(d18:2/22:0) |
| 2 | Cer(d18:2/24:0) |
| 2 | SM(d18:1/21:0) |
| 2 | HexCer(t17:2/42:1(2OH)) |
| 2 | Cer(d16:1/23:0) |
| 2 | CE(14:0) |
| 2 | HexCer(d18:1/24:0) |
| 2 | CE(18:3) |
| 2 | Cer(d18:0/23:0) |
| 2 | CE(22:5) |
| 2 | Cer(d20:2/24:0) |
| 2 | Cer(d24:0/18:0) |
| 2 | Cer(d24:0/18:1) |
| 2 | Cer(d22:2/22:2) |
| 2 | HexCer(d18:2/22:0) |
| 2 | DL-Carnitine |
| 2 | LPC(15:0/0:0) |
| 2 | CE(19:1) |
| 2 | PC(O-16:0_22:0) |
| 2 | LPC(18:0/0:0) |
| 2 | SM(d20:0/24:1) |
| 2 | LPC(0:0/18:0) |
| 2 | Cer(d24:1/18:0(2OH)) |
| 2 | HexCer(d18:1/22:0) |
| 2 | Cer(d17:1/24:0) |
| 2 | PE(P-20:0_20:3) |
| 2 | Cer(t16:1/26:0) |
| 2 | SM(d18:1/20:1) |
| 2 | PC(O-16:0_22:1) |
| 2 | Cer(d18:1/23:0) |
| 2 | CE(18:2) |
| 2 | Cer(d17:1/23:1) |
| 2 | CE(22:6) |
| 2 | Cer(d17:1/22:0) |
| 2 | Cer(d16:1/24:0) |
| 2 | CE(20:1) |
| 2 | DG(O-16:0_20:0) |
| 2 | PE(P-18:0_16:0) |
| 2 | Cer(d18:2/23:0) |
| 2 | PE(P-18:2_22:6) |
| 2 | Cer(t18:1/24:0) |
| 2 | PE(P-18:0_22:5) |
| 2 | Cer(d17:1/25:1) |
| 2 | Cer(d16:1/22:0) |
| 2 | Cer(d18:2/24:0(2OH)) |
| 2 | LPC(16:0/0:0) |
| 2 | PE(P-18:1_18:2) |
| 2 | CE(15:0) |
| 2 | LPC(0:0/16:0) |
| 2 | Cer(d19:1/22:0) |
| 2 | SM(d18:1/14:0) |
| 2 | Cer(d17:1/23:0) |
| 2 | HexCer(d16:1/22:0) |
| 2 | Cer(t17:2/16:1) |
| 2 | CE(16:0) |
| 2 | Carnitine C3:0 |
| 2 | CE(20:4) |
| 2 | Cer(d18:1/24:0) |
| 2 | DG(O-19:2_20:0) |
| 2 | Cer(d18:2/22:0(2OH)) |
| 2 | SM(d18:1/22:1) |
| 2 | CE(18:1) |
| 2 | LPC(0:0/15:0) |
| 2 | SM(d18:1/22:0) |
| 2 | SM(d18:1/23:1) |
| 2 | Cer(t18:0/22:0) |
| 2 | PE(P-18:1_20:4) |
| 2 | PE(P-18:1_22:6) |
| 2 | SM(d18:2/14:0) |
| 2 | LPC(24:0/0:0) |
| 2 | PE(P-16:1_22:2) |
| 2 | LPC(17:0/0:0) |
| 2 | PE(P-16:0_22:5) |
| 2 | MG(17:0) |
| 2 | PC(O-16:0_20:4) |
| 2 | Carnitine C8:1 |
| 2 | LPC(O-16:1) |
| 2 | Carnitine C18:0 |
| 2 | PE(P-16:0_20:4) |
| 2 | MG(18:2) |
| 2 | LPC(0:0/17:0) |
| 2 | SM(d18:2/18:1) |
| 2 | SM(d18:2/24:3) |
| 2 | SM(d18:1/12:0) |
| 2 | HexCer(d19:1/24:0) |
| 2 | CE(20:2) |
| 2 | Cer(t20:2/18:0(2OH)) |
| 2 | Cer(d25:1/32:0(2OH)) |
| 2 | SM(d18:1/17:1) |
| 2 | Cer(d20:2/22:0) |
| 2 | SM(d18:1/20:0) |
| 2 | PC(O-16:1_16:1) |
| 2 | Cer(t17:2/20:2) |
| 2 | HexCer(d16:1/24:0) |
| 2 | Cer(d16:1/21:0) |
| 2 | Cer(t18:0/22:2(2OH)) |
| 2 | CE(19:2) |
| 2 | Cer(d22:1/23:1(2OH)) |
| 2 | Cer(t18:1/14:1) |
| 2 | HexCer(t18:2/20:0(2OH)) |
| 2 | PE(P-18:0_22:1) |
| 2 | HexCer(d19:1/22:0) |
| 2 | CE(17:2) |
| 2 | CE(20:0) |
| 2 | CE(22:0) |
| 2 | PE(P-18:0_20:0) |
| 2 | HexCer(t14:1/24:0(2OH)) |
| 2 | Cer(d17:1/26:0) |
| 2 | PE(P-18:2_20:5) |
| 2 | TG(18:3_20:4_20:4) |
| 2 | Cer(d20:2/23:0) |
| 2 | PC(O-14:0_20:4) |
| 2 | LPC(14:1/0:0) |
| 2 | TG(17:1_18:2_22:6) |
| 2 | PE(P-17:0_20:3) |
| 2 | CerP(d18:1/24:1) |
| 2 | DG(16:2_18:2) |
| 2 | LPC(15:1/0:0) |
| 2 | HexCer(d17:1/24:0) |
| 2 | PE(P-14:0_22:6) |
| 2 | PE(P-20:0_22:5) |
| 2 | Cer(d18:1/26:2(2OH)) |
| 2 | Cer(d17:2/24:1) |
| 2 | CE(22:3) |
| 2 | Cer(t22:1/16:1(2OH)) |
| 2 | Cer(d18:0/24:0) |
| 2 | Cer(d18:1/16:0(2OH)) |
| 2 | HexCer(t14:0/24:1(2OH)) |
| 2 | PC(10:0_10:0) |
| 2 | PE(12:0_22:4) |
| 2 | PG(17:0_22:1) |
| 2 | PE(12:0_16:0) |
| 2 | PE(O-18:1_22:6) |
| 2 | PI(20:3_18:0) |
| 2 | FFA(24:6) |
| 2 | FFA(18:0) |
| 2 | PG(10:0_14:0) |
| 2 | FFA(17:0) |
| 2 | FFA(18:3) |
| 2 | PC(18:2_20:4) |
| 2 | PA(18:0_22:4) |
| 2 | PA(12:0_22:4) |
| 2 | PE(13:0_20:5) |
| 2 | FFA(20:2) |
| 2 | PC(16:0_20:4) |
| 2 | PE(14:0_20:2) |
| 2 | PA(12:0_18:4) |
| 2 | PC(18:2_22:6) |
| 2 | PE(O-16:0_20:4) |
| 2 | PE(O-16:0_18:1) |
| 2 | PC(19:0_18:2) |
| 2 | LPA(0:0/16:0) |
| 2 | PC(20:4_16:1) |
| 2 | PG(12:0_17:1) |
| 2 | PG(12:0_14:1) |
| 2 | PG(20:0_20:4) |
| 2 | PE(20:0_18:0) |
| 2 | PC(14:0_18:2) |
| 2 | PC(18:0_22:1) |
| 2 | PE(O-18:2_22:6) |
| 2 | PE(O-18:2_20:4) |
| 2 | FFA(14:0) |
| 2 | PC(17:0_18:2) |
| 2 | PE(20:4_22:2) |
| 2 | FFA(15:0) |
| 2 | PE(O-18:1_22:5) |
| 2 | Chenodeoxycholic acid |
| 2 | PS(12:0_13:0) |
| 2 | PE(O-16:1_22:5) |
| 2 | FFA(20:3) |
| 2 | PC(18:2_20:3) |
| 2 | PS(12:0_16:0) |
| 2 | PE(O-16:1_22:6) |
| 2 | PE(O-18:2_22:5) |
| 2 | PI(15:0_18:2) |
| 2 | PG(16:0_20:5) |
| 2 | PA(20:0_22:6) |
| 2 | PE(O-16:0_18:2) |
| 2 | PS(18:0_15:1) |
| 2 | PE(O-17:1_20:4) |
| 2 | PC(18:0_20:3) |
| 2 | PI(18:0_20:4) |
| 2 | FFA(22:6) |
| 2 | PG(18:0_16:1) |
| 2 | PI(12:0_18:1) |
| 2 | PE(O-18:0_22:6) |
| 2 | PC(13:0_14:0) |
| 2 | PC(14:0_18:1) |
| 2 | PA(18:0_22:6) |
| 2 | 6,7-diketolithocholic acid |
| 2 | PE(O-22:0_18:2) |
| 2 | FFA(22:5) |
| 2 | PG(18:2_22:5) |
| 2 | PG(16:0_18:3) |
| 2 | FFA(16:0) |
| 2 | PG(16:0_22:1) |
| 2 | PA(18:1_18:2) |
| 2 | PE(O-22:1_20:3) |
| 2 | PC(14:0_20:4) |
| 2 | PC(20:4_20:4) |
| 2 | PC(15:0_20:4) |
| 2 | PG(9:0_22:4) |
| 2 | PS(18:0_22:1) |
| 2 | PMeOH(16:0_18:2) |
| 2 | PC(20:4_17:0) |
| 2 | PG(18:2_20:4) |
| 2 | PA(19:0_20:4) |
| 2 | PC(14:0_22:6) |
| 2 | PE(O-18:3_20:4) |
| 2 | PC(16:1_22:6) |
| 2 | PE(16:1_22:4) |
| 2 | TXB2 |
| 2 | PE(19:0_18:2) |
| 2 | PE(O-18:2_20:5) |
| 2 | PI(18:0_20:3) |
| 2 | PE(14:0_22:4) |
| 2 | PG(19:0_22:6) |
| 2 | PI(13:0_18:2) |
| 2 | PE(O-17:1_22:5) |
| 2 | PE(O-16:0_22:6) |
| 2 | PE(22:3_20:4) |
| 2 | PI(18:0_22:5) |
| 2 | PC(14:0_19:2) |
| 2 | PA(20:2_22:5) |
| 5 | TG(14:0_16:1_18:1) |
| 5 | Cer(t20:2/38:2(2OH)) |
| 5 | TG(16:0_17:1_18:2) |
| 5 | SHexCer(d18:1/24:0) |
| 5 | TG(16:0_16:0_20:4) |
| 5 | CE(17:1) |
| 5 | TG(15:0_17:0_19:2) |
| 5 | TG(14:0_16:0_20:4) |
| 5 | TG(18:1_18:1_22:4) |
| 5 | TG(16:0_16:0_18:1) |
| 5 | Cer(d16:1/24:1) |
| 5 | TG(16:0_18:0_18:0) |
| 5 | Carnitine C20:4 |
| 5 | TG(16:1_18:1_16:3) |
| 5 | TG(14:0_16:0_16:1) |
| 5 | Cer(d16:1/18:0) |
| 5 | TG(18:0_18:1_20:1) |
| 5 | TG(16:1_16:1_18:3) |
| 5 | TG(16:0_18:0_18:1) |
| 5 | TG(16:0_18:1_22:4) |
| 5 | TG(15:0_16:1_18:1) |
| 5 | TG(12:0_16:0_18:1) |
| 5 | CE(20:3) |
| 5 | DG(16:0_18:1) |
| 5 | TG(15:0_16:0_16:0) |
| 5 | TG(16:1_18:1_18:1) |
| 5 | TG(16:0_18:1_20:1) |
| 5 | HexCer(d16:1/24:1) |
| 5 | TG(18:0_18:1_18:1) |
| 5 | TG(16:0_16:1_22:6) |
| 5 | DG(18:0_18:1) |
| 5 | TG(16:0_18:0_20:1) |
| 5 | Cer(t20:1/38:2(2OH)) |
| 5 | TG(16:0_16:1_18:3) |
| 5 | DG(18:0_18:2) |
| 5 | TG(18:0_18:1_20:0) |
| 5 | Cer(t26:2/34:2(2OH)) |
| 5 | TG(16:0_16:1_16:1) |
| 5 | TG(18:0_18:0_18:1) |
| 5 | TG(16:0_16:1_18:2) |
| 5 | TG(16:0_20:0_18:1) |
| 5 | DG(18:1_18:1) |
| 5 | TG(17:0_18:1_20:4) |
| 5 | Cer(t20:2/36:1(2OH)) |
| 5 | TG(16:0_17:0_18:1) |
| 5 | TG(16:1_16:1_18:2) |
| 5 | TG(15:0_16:1_18:2) |
| 5 | TG(16:0_16:2_18:3) |
| 5 | Cer(d20:1/24:1) |
| 5 | TG(15:0_16:0_18:1) |
| 5 | TG(16:0_16:1_20:4) |
| 5 | TG(16:0_18:5_20:5) |
| 5 | TG(16:0_14:1_18:2) |
| 5 | Cer(t22:2/38:2(2OH)) |
| 5 | TG(16:1_18:0_20:1) |
| 5 | TG(16:0_18:1_20:4) |
| 5 | TG(14:0_16:0_18:2) |
| 5 | TG(16:0_17:1_18:1) |
| 5 | TG(O-20:0_16:0_18:2) |
| 5 | TG(16:1_17:1_18:1) |
| 5 | TG(16:0_18:0_18:2) |
| 5 | DG(18:1_20:4) |
| 5 | Cer(t17:2/35:0) |
| 5 | TG(16:0_16:0_16:1) |
| 5 | TG(16:1_16:1_18:1) |
| 5 | TG(16:0_18:1_22:1) |
| 5 | TG(18:0_17:1_18:1) |
| 5 | TG(16:0_16:0_18:0) |
| 5 | DG(16:1_18:1) |
| 5 | TG(16:0_16:1_20:5) |
| 5 | TG(16:0_18:1_18:1) |
| 5 | TG(18:0_16:1_20:1) |
| 5 | TG(16:0_18:4_20:5) |
| 5 | TG(16:0_18:0_20:0) |
| 5 | TG(16:0_18:2_20:4) |
| 5 | TG(12:0_16:1_18:2) |
| 5 | LPC(14:0/0:0) |
| 5 | TG(16:0_16:1_20:1) |
| 5 | TG(18:0_18:2_20:0) |
| 5 | TG(16:1_17:1_18:2) |
| 5 | Cer(t24:1/34:2(2OH)) |
| 5 | TG(18:0_18:1_22:4) |
| 5 | Cer(d18:2/40:2(2OH)) |
| 5 | TG(16:0_16:1_18:1) |
| 5 | TG(14:0_16:0_18:1) |
| 5 | TG(18:1_18:2_22:3) |
| 5 | Cer(t18:2/38:2(2OH)) |
| 5 | TG(16:0_16:0_20:2) |
| 5 | Cer(d18:2/18:0) |
| 5 | TG(16:0_16:0_16:0) |
| 5 | LPC(22:6/0:0) |
| 5 | Cer(t20:2/36:2(2OH)) |
| 5 | TG(17:0_18:1_18:1) |
| 5 | DG(14:0_16:0) |
| 5 | TG(16:0_16:0_22:6) |
| 5 | TG(16:0_16:1_17:1) |
| 5 | Cer(d16:1/20:0) |
| 5 | TG(14:0_18:0_20:0) |
| 5 | Cer(d29:1/28:0(2OH)) |
| 5 | TG(14:0_16:0_16:0) |
| 5 | LPE(22:6/0:0) |
| 5 | TG(15:0_18:1_22:1) |
| 5 | Cer(t18:2/40:2(2OH)) |
| 5 | TG(16:0_18:2_18:4) |
| 5 | Cer(t18:1/36:2(2OH)) |
| 5 | Cer(t22:2/34:2(2OH)) |
| 5 | TG(14:0_18:0_18:2) |
| 5 | Cer(t18:1/36:1(2OH)) |
| 5 | Cer(t17:0/22:2) |
| 5 | LPE(22:4/0:0) |
| 5 | TG(17:0_18:0_18:1) |
| 5 | TG(14:0_16:0_22:5) |
| 5 | TG(16:1_16:1_20:5) |
| 5 | Cer(t20:2/38:1(2OH)) |
| 5 | Carnitine C20:3 |
| 5 | TG(12:0_16:0_22:5) |
| 5 | TG(16:0_18:1_19:1) |
| 5 | TG(16:1_18:1_20:3) |
| 5 | TG(16:0_18:1_24:1) |
| 5 | TG(16:0_26:0_18:1) |
| 5 | TG(16:1_18:3_20:4) |
| 5 | TG(10:0_18:1_18:2) |
| 5 | HexCer(d16:1/18:0) |
| 5 | TG(16:0_17:0_18:0) |
| 5 | TG(14:0_16:1_20:4) |
| 5 | TG(16:0_16:0_24:0) |
| 5 | Cer(t21:0/22:0) |
| 5 | SM(d18:0/18:0) |
| 5 | DG(16:0_20:4) |
| 5 | DG(O-21:0_16:0) |
| 5 | TG(14:0_16:1_18:3) |
| 5 | TG(14:0_17:1_18:2) |
| 5 | Cer(d26:3/35:1(2OH)) |
| 5 | TG(16:0_18:0_24:0) |
| 5 | TG(16:1_20:4_20:5) |
| 5 | TG(15:0_16:0_16:1) |
| 5 | TG(10:0_16:0_18:1) |
| 5 | Cer(d18:2/14:0) |
| 5 | TG(16:0_16:0_17:0) |
| 5 | DG(16:0_20:0) |
| 5 | TG(16:0_16:1_22:5) |
| 5 | TG(16:0_15:1_18:2) |
| 5 | HexCer(d18:2/26:0) |
| 5 | Cer(t22:2/36:1(2OH)) |
| 5 | TG(15:0_18:0_20:0) |
| 5 | TG(12:0_18:1_22:6) |
| 5 | TG(16:0_18:1_24:4) |
| 5 | Cer(d24:3/33:0(2OH)) |
| 5 | TG(18:1_20:3_22:4) |
| 5 | DG(14:0_18:1) |
| 5 | TG(18:2_18:3_18:4) |
| 5 | DG(16:0_16:1) |
| 5 | TG(16:0_23:0_18:1) |
| 5 | TG(16:0_25:0_18:1) |
| 5 | TG(18:2_18:3_20:5) |
| 5 | TG(10:0_16:0_18:2) |
| 5 | DG(18:1_20:3) |
| 5 | TG(15:0_18:0_18:1) |
| 5 | TG(15:1_15:1_19:2) |
| 5 | HexCer(t20:2/38:2(2OH)) |
| 5 | TG(12:0_16:2_18:2) |
| 5 | TG(18:0_18:1_19:1) |
| 5 | TG(14:0_15:0_18:2) |
| 5 | TG(14:0_16:1_17:1) |
| 5 | TG(16:0_18:1_21:0) |
| 5 | TG(14:0_18:2_18:4) |
| 5 | TG(15:1_17:1_17:1) |
| 5 | TG(14:0_14:1_16:1) |
| 5 | TG(17:0_17:0_19:1) |
| 5 | TG(15:0_16:0_18:0) |
| 5 | TG(14:0_16:1_20:5) |
| 5 | DG(16:1_18:2) |
| 5 | TG(17:0_18:2_22:5) |
| 5 | TG(18:0_20:1_22:1) |
| 5 | DG(18:1_22:4) |
| 5 | Cer(t20:2/34:1(2OH)) |
| 5 | TG(16:0_16:1_22:1) |
| 5 | TG(10:0_16:0_18:3) |
| 5 | TG(15:0_16:0_24:1) |
| 5 | PC(16:0_22:5) |
| 5 | PE(16:0_20:4) |
| 5 | PE(18:2_16:0) |
| 5 | PI(18:0_19:0) |
| 5 | PG(16:1_20:3) |
| 5 | PE(16:0_18:1) |
| 5 | PC(16:0_20:2) |
| 5 | LNAPE(16:0/N-18:1) |
| 5 | PG(20:1_18:1) |
| 5 | PE(22:6_16:0) |
| 5 | PG(18:0_19:0) |
| 5 | PE(22:6_18:0) |
| 5 | PE(18:0_22:5) |
| 5 | PS(18:0_18:0) |
| 5 | PC(17:0_20:3) |
| 5 | PG(17:0_18:0) |
| 5 | PE(16:0_22:5) |
| 5 | PC(18:0_22:4) |
| 5 | PC(15:0_16:0) |
| 5 | PE(16:0_20:3) |
| 5 | PE(16:0_16:0) |
| 5 | PC(16:1_20:3) |
| 5 | PC(20:3_20:4) |
| 5 | PE(16:0_20:5) |
| 5 | PI(18:0_20:0) |
| 5 | PC(18:0_14:0) |
| 5 | PS(21:0_18:2) |
| 5 | PE(16:1_18:0) |
| 5 | PC(18:0_22:5) |

**Table S2.** The ROC reports between all controls compared with TB-CAD.

| **Lipid metabolites** | **Sensitive** | **Specific** | **Youden's index** | **AUC** |
| --- | --- | --- | --- | --- |
| CE(20:0) | 0.67 | 0.82 | 0.49 | 0.793 |
| PC(14:0_20:4) | 0.87 | 0.59 | 0.46 | 0.792 |
| CE(18:0) | 0.7 | 0.81 | 0.51 | 0.791 |
| PC(16:0_20:2) | 0.87 | 0.6 | 0.47 | 0.786 |
| PC(17:0_20:3) | 0.57 | 0.91 | 0.48 | 0.781 |
| PC(14:0_22:6) | 0.77 | 0.72 | 0.49 | 0.78 |
| PG(16:1_20:3) | 0.6 | 0.87 | 0.47 | 0.778 |
| PC(20:3_20:4) | 0.97 | 0.49 | 0.46 | 0.777 |
| PI(18:0_19:0) | 0.77 | 0.68 | 0.45 | 0.767 |
| DG(18:1_20:3) | 0.83 | 0.6 | 0.43 | 0.763 |
| CE(20:3) | 0.83 | 0.69 | 0.52 | 0.762 |
| PE(14:0_22:4) | 0.9 | 0.46 | 0.36 | 0.758 |
| Cer(d18:1/28:2) | 0.87 | 0.56 | 0.43 | 0.746 |
| PC(16:0_22:5) | 0.63 | 0.8 | 0.43 | 0.746 |
| Cer(t20:1/38:2(2OH)) | 0.6 | 0.81 | 0.41 | 0.745 |
| CE(20:5) | 0.63 | 0.82 | 0.45 | 0.743 |
| TG(17:1_17:1_24:6) | 0.6 | 0.82 | 0.42 | 0.74 |
| DG(14:0_18:1) | 0.77 | 0.67 | 0.44 | 0.732 |
| Goose Deoxycholic Acid | 0.77 | 0.71 | 0.48 | 0.731 |
| TG(18:0_16:1_20:1) | 0.9 | 0.5 | 0.4 | 0.727 |
| CE(14:0) | 0.67 | 0.73 | 0.4 | 0.726 |
| SM(d18:2/14:0) | 0.6 | 0.74 | 0.34 | 0.726 |
| Cer(t17:1/22:2) | 0.7 | 0.69 | 0.39 | 0.726 |
| PG(9:0_22:4) | 0.67 | 0.74 | 0.41 | 0.723 |
| DG(18:0_18:1) | 0.77 | 0.67 | 0.44 | 0.721 |
| LPC(14:0/0:0) | 0.47 | 0.91 | 0.38 | 0.718 |
| TG(14:0_18:0_18:2) | 0.67 | 0.69 | 0.36 | 0.717 |
| LPC(16:0/0:0) | 0.8 | 0.62 | 0.42 | 0.715 |
| PC(18:0_22:4) | 0.8 | 0.52 | 0.32 | 0.712 |
| PI(18:0_20:0) | 0.9 | 0.44 | 0.34 | 0.709 |
| CE(17:1) | 0.73 | 0.7 | 0.43 | 0.707 |
| PE(20:0_18:0) | 0.43 | 0.9 | 0.33 | 0.705 |
| PC(18:0_20:3) | 0.8 | 0.6 | 0.4 | 0.704 |
| Cer(d18:1/19:1(2OH)) | 0.53 | 0.87 | 0.4 | 0.703 |
| PC(16:1_20:3) | 0.7 | 0.63 | 0.33 | 0.702 |
| CE(18:3) | 0.63 | 0.74 | 0.37 | 0.7 |
| Carnitine C20:4 | 0.67 | 0.64 | 0.31 | 0.699 |
| CE(17:2) | 0.57 | 0.79 | 0.36 | 0.699 |
| Cer(d16:1/21:0) | 0.5 | 0.91 | 0.41 | 0.695 |
| LPC(0:0/18:0) | 0.57 | 0.79 | 0.36 | 0.686 |
| DG(16:2_18:2) | 0.7 | 0.62 | 0.32 | 0.67 |
| Cer(t14:1/21:0) | 0.5 | 0.82 | 0.32 | 0.667 |
| DG(16:0_18:0) | 0.87 | 0.43 | 0.3 | 0.654 |
| DG(16:0_16:0) | 0.83 | 0.52 | 0.35 | 0.643 |
| Carnitine C6-2OH | 0.9 | 0.41 | 0.31 | 0.64 |
| HexCer(t18:1/20:0(2OH)) | 0.57 | 0.69 | 0.26 | 0.636 |
| TG(16:1_18:1_18:2) | 0.7 | 0.62 | 0.32 | 0.623 |
| Cer(t26:1/12:1(2OH)) | 0.57 | 0.67 | 0.24 | 0.613 |
| PE(13:0_19:2) | 0.6 | 0.63 | 0.23 | 0.599 |
